# Supplementary material for: An Evidence-based Assessment of Genes in Dilated Cardiomyopathy
Source: bioRxiv or medRxiv preprint supplement (doi:10.1101/2020.12.10.20247197), 2020-12-15
Supplement: Supplementary file [file media-1.pdf]

## SUPPLEMENTAL MATERIAL

### Supplementary Methods

#### *Panel membership and workflow*

DCM gene curation activities were carried out by an international, multi-site Panel of individuals with expertise in laboratory science, molecular diagnostics, research, and/or clinical care in idiopathic DCM. The Panel, termed “The DCM Gene Curation Expert Panel,” a sub-working group of the ClinGen Cardiovascular Clinical Domain Working Group, was composed of 34 individuals from over 20 institutions representing 7 countries (United States, Canada, Netherlands, Australia, United Kingdom, Switzerland, and Italy). Using the ClinGen standard operating procedure (SOP) version 7 (<https://clinicalgenome.org/docs/summary-of-updates-to-the-clingen-gene-clinical-validity-curation-sop-version-7/>), curators scored available evidence and prepared a presentation for full Panel review, discussion, and approval during a biweekly conference call between September 2019 and October 2020 to establish a final classification. Curated data was entered into a web interface, the Gene Curation Interface (GCI), to organize and record evaluated evidence.

#### *Development of the DCM gene list*

To develop a comprehensive list of genes thought to have a role in the development of DCM in humans, a comprehensive search was conducted in three National Center for Biotechnology Information database resources in October 2017: Gene (<https://www.ncbi.nlm.nih.gov/gene>), Online Mendelian Inheritance in Man (OMIM)<sup>1</sup> (<https://www.ncbi.nlm.nih.gov/omim>), and GenBank<sup>2</sup> (<https://www.ncbi.nlm.nih.gov/genbank/>). Starting with Gene, the search terms “dilated cardiomyopathy” OR “cardiomyopathy, dilated” were applied and limited to Homo Sapiens to identify 199 genes. A subsequent search in OMIM

and GenBank using the same search terms, limiting to Animals and Genomic DNA/RNA as the molecule type, identified a list of 204 genes. This initial list was further expanded when adding additional genes not identified in the database query from an expansive DCM gene list that had been previously published<sup>3</sup>, which added 63 genes. The full initial list included 267 genes.

Each gene was then manually evaluated by performing a PubMed search of the “[GENE]” AND “dilated cardiomyopathy” in addition to “[GENE]” AND “cardiomyopathy, dilated” to identify relevant publications proposing a role in the development of idiopathic DCM in humans (May 2018). Genes were removed for the following reasons: those specified as possible candidate genes without supporting animal or human genetic evidence; those that did not have published evidence in human idiopathic DCM; those described as primarily part of a syndrome; and those primarily observed in other non-DCM cardiovascular diseases. Following the application of these criteria, 56 genes remained.

Genes implicated in more than one disease underwent pre-curation to confirm the DCM disease entity and mode of inheritance for each gene curated (<https://clinicalgenome.org/working-groups/lumping-and-splitting/>). Pre-curations were performed to identify the disease entity and mode of inheritance. Pre-curations were shared with the Panel for review prior to formal preparation and scoring of evidence to assign a gene-disease validity classification. During this process, five genes were removed from the curation schedule due to syndromic disease entity (*SDHA*), lack of sufficient evidence specific to the DCM phenotype as defined for this curation effort (*DSC2*, *GATA4*, *GATA6*), or a different cardiomyopathy sub-type as the primary disease entity without a clear assertion for an isolated DCM phenotype in a single gene-disease relationship (*ALPK3*). The remaining 51 genes represent the final gene list (June 2019) (Figure S1).

Five of the genes on the final list were identified as predicted to be classified as definitive (*BAG3*, *LMNA*, *MYH7*, *TNNT2*, and *TTN*) and therefore underwent an expedited curation, requiring the review and approval of two Panel members of the evidence review in an offline mechanism, followed by review and approval of the evidence summary by the full Panel prior to publishing. In addition, two genes had been recently curated by the Hypertrophic Cardiomyopathy Gene Curation Expert Panel (HCM GCEP) for an applicable disease entity, intrinsic cardiomyopathy (MONDO:0000591), and mode of inheritance prior to the DCM gene curation project (*PLN*, <https://search.clinicalgenome.org/kb/gene-validity/8772>; *ACTN2* <https://search.clinicalgenome.org/kb/gene-validity/8772>)<sup>4</sup>. The other 44 genes underwent the standard curation process.

#### *Curation of Published Evidence*

Evaluation of genetic evidence included publications presenting clinical data for patients, families, and large cohorts that could be consider for scoring of individual variants, segregation in pedigrees, and case-control analyses. A minor allele frequency (MAF) cut-off for the maximum credible frequency to have a pathogenic effect was calculated using an allele frequency calculator which integrates disease prevalence, mode of inheritance, genetic and allelic heterogeneity, and penetrance (<https://www.cardiodb.org/allelefrequencyapp/>).<sup>5</sup> We sought to produce a conservative estimate consistent with Mendelian, autosomal dominant disease, occurring at a prevalence 1/250 individuals in the population<sup>6</sup>. While reduced penetrance is commonly observed in DCM, penetrance estimates are not widely available. Further, the penetrance of the genes included in the curation list are anticipated to vary widely, therefore, estimates of 20-40% penetrance were considered. DCM is also highly heterogeneous, with no single variant causing more than 1-2% of DCM cases. Taking these values into consideration, a

maximum credible population allele frequency of 0.0001 was generated, consistent with the clinical standard<sup>7</sup> for monogenic DCM. Variants with a MAF <0.0001 were scored in the curation of genetic evidence.

Experimental evidence was assessed by category (expression data, functional alterations, model systems, and rescue). Expression evidence prioritized studies of human cardiomyocytes or animal models as an alternative when human models were not available. Model systems assessing the disruption to the gene in consideration demonstrated a phenotype suggestive of DCM, and rescue models using cell-culture or non-human animal models with DCM could be rescued by restoring wild-type gene product. Experimental data only evaluating rare variants with some evidence of impact were scored.

Genes with a score reaching a strong classification that demonstrated replication over time in the literature, as defined by at least three years since original publication and at least two independent supporting publications, were classified as definitive. Limited evidence genes lack substantial evidence supporting the gene-disease relationship, however, data challenging the relationship is also not present, and therefore while the role in monogenic disease is not supported based on currently available evidence, the clinical relevance of these genes is not ruled out. Genes were classified as disputed when evidence was deemed insufficient and panel opinion and/or literature questioned the biological relevance of the gene in the disease. Genes classified as no known disease relationship and animal model only represent candidate genes that do not yet have sufficient human data to evaluate for a clinical classification.

**Supplemental Figure**

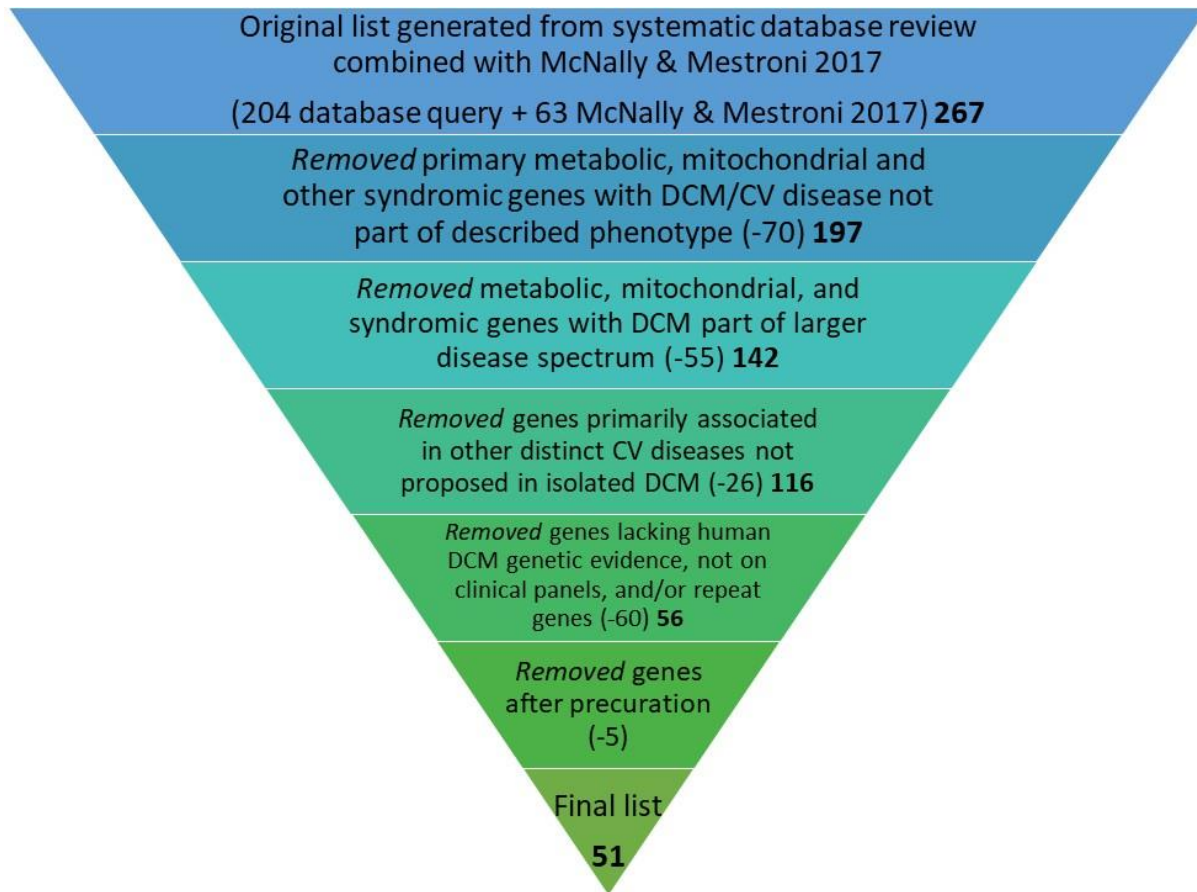

**Figure S1. DCM gene list filtering.** An original list of 267 genes, generated by OMIM, Gene, and GenBank database queries combined with a previously published DCM gene list<sup>3</sup>, was filtered down to a list of 51 genes indicated in humans with isolated, idiopathic DCM that proceeded through the gene curation process. CV = cardiovascular; DCM = dilated cardiomyopathy.

## Supplemental References

1. Hamosh A, Scott AF, Amberger JS, Bocchini CA, McKusick VA. Online Mendelian Inheritance in Man (OMIM), a knowledgebase of human genes and genetic disorders. *Nucleic Acids Res.* 2005;33(Database issue):D514-517.
2. Benson DA, Karsch-Mizrachi I, Clark K, Lipman DJ, Ostell J, Sayers EW. GenBank. *Nucleic Acids Res.* 2012;40(Database issue):D48-53.
3. McNally EM, Mestroni L. Dilated Cardiomyopathy: Genetic Determinants and Mechanisms. *Circ Res.* 2017;121(7):731-748.
4. Ingles J, Goldstein J, Thaxton C, et al. Evaluating the Clinical Validity of Hypertrophic Cardiomyopathy Genes. *Circ Genom Precis Med.* 2019.
5. Whiffin N, Minikel E, Walsh R, et al. Using high-resolution variant frequencies to empower clinical genome interpretation. *Genet Med.* 2017;19(10):1151-1158.
6. Hershberger RE, Hedges DJ, Morales A. Dilated cardiomyopathy: the complexity of a diverse genetic architecture. *Nat Rev Cardiol.* 2013;10(9):531-547.
7. Nykamp K, Anderson M, Powers M, et al. Sherlock: a comprehensive refinement of the ACMG-AMP variant classification criteria. *Genet Med.* 2017;19(10):1105-1117.

Supplemental Table 1: Gene List Filtering

| ORIGINAL LIST (OMIM; GENE; GenBank) | McNally 2017 (PMID 28912180) | REMOVED GENES (ALL) | REMOVED-MT/METABOLIC/ SYNDROMIC | REMOVED- NOT IDIOPATHIC DCM (OTHER CM/CV DZ) | REMOVED - NOT IDIOPATHIC DCM (NON-CV DZ/syndrome) | REMOVED - PRECURATION | REMOVED - OTHER | FINAL LIST    |
|-------------------------------------|------------------------------|---------------------|---------------------------------|----------------------------------------------|---------------------------------------------------|-----------------------|-----------------|---------------|
| <b>ABCC9</b>                        | <b>ABCC9</b>                 |                     |                                 |                                              |                                                   |                       |                 | <b>ABCC9</b>  |
| ACADVL                              |                              | ACADVL              | ACADVL                          |                                              |                                                   |                       |                 |               |
| ACE                                 |                              | ACE                 |                                 |                                              | ACE                                               |                       |                 |               |
| <b>ACTC1</b>                        | <b>ACTC1</b>                 |                     |                                 |                                              |                                                   |                       |                 | <b>ACTC1</b>  |
| <b>ACTN2</b>                        | <b>ACTN2</b>                 |                     |                                 |                                              |                                                   |                       |                 | <b>ACTN2</b>  |
| ADIPOQ                              |                              | ADIPOQ              | ADIPOQ                          |                                              |                                                   |                       |                 |               |
| ADORA1                              |                              | ADORA1              |                                 |                                              | ADORA1                                            |                       |                 |               |
| ADRA2C                              |                              | ADRA2C              |                                 | ADRA2C                                       |                                                   |                       |                 |               |
| ADRB1                               |                              | ADRB1               |                                 | ADRB1                                        |                                                   |                       |                 |               |
| ADRB2                               |                              | ADRB2               |                                 |                                              | ADRB2                                             |                       |                 |               |
|                                     | AGL                          | AGL                 | AGL                             |                                              |                                                   |                       |                 |               |
| AGT                                 |                              | AGT                 |                                 |                                              | AGT                                               |                       |                 |               |
| AGTR1                               |                              | AGTR1               |                                 |                                              | AGTR1                                             |                       |                 |               |
| ALMS1                               | ALMS1                        | ALMS1               | ALMS1                           |                                              |                                                   |                       |                 |               |
|                                     | ALPK3                        | ALPK3               |                                 |                                              |                                                   | ALPK3                 |                 |               |
| <b>ANKRD1</b>                       | <b>ANKRD1</b>                |                     |                                 |                                              |                                                   |                       |                 | <b>ANKRD1</b> |
| ANOS                                |                              | ANOS                | ANOS                            |                                              |                                                   |                       |                 |               |
| AR                                  |                              | AR                  |                                 |                                              | AR                                                |                       |                 |               |
| <b>BAG3</b>                         | <b>BAG3</b>                  |                     |                                 |                                              |                                                   |                       |                 | <b>BAG3</b>   |
| BCL2                                |                              | BCL2                |                                 |                                              |                                                   |                       | BCL2            |               |
| BMP4                                |                              | BMP4                |                                 |                                              | BMP4                                              |                       |                 |               |
|                                     | BRAF                         | BRAF                | BRAF                            |                                              |                                                   |                       |                 |               |
| BTNL2                               |                              | BTNL2               |                                 | BTNL2                                        |                                                   |                       |                 |               |
|                                     | CACNA1C                      | CACNA1C             |                                 | CACNA1C                                      |                                                   |                       |                 |               |
| CACNG8                              |                              | CACNG8              |                                 |                                              |                                                   |                       | CACNG8          |               |
|                                     | CALR3                        | CALR3               |                                 |                                              |                                                   |                       | CALR3           |               |
| CASK                                |                              | CASK                |                                 |                                              | CASK                                              |                       |                 |               |
|                                     | CASQ2                        | CASQ2               |                                 | CASQ2                                        |                                                   |                       |                 |               |
| CASZ1                               |                              | CASZ1               |                                 |                                              |                                                   |                       | CASZ1           |               |
|                                     | CAV3 (MURC)                  | CAVIN4/MURC         |                                 | CAV3                                         |                                                   |                       | REPEAT (MURC)   |               |
| CAVIN4                              |                              | CD34                |                                 |                                              |                                                   |                       | CD34            |               |
| CD34                                |                              | CD40LG              |                                 |                                              | CD40LG                                            |                       |                 |               |
| CD40LG                              |                              | CD46                |                                 |                                              | CD46                                              |                       |                 |               |
| CD46                                |                              | CDH2                | CDH2                            |                                              |                                                   |                       |                 |               |
| CDH2                                |                              | CHGA                |                                 |                                              |                                                   |                       | CHGA            |               |
| CHGA                                |                              | CHRM2               |                                 |                                              |                                                   |                       | CHRM2           |               |
|                                     | CHRM3                        | CHRM3               |                                 |                                              | CHRM3                                             |                       |                 |               |
| CMD1B                               |                              | CMD1B               |                                 |                                              |                                                   |                       | CMD1B           |               |
| CMD1H                               |                              | CMD1H               |                                 |                                              |                                                   |                       | CMD1H           |               |
| CMD1K                               |                              | CMD1K               |                                 |                                              |                                                   |                       | CMD1K           |               |
| CMD1Q                               |                              | CMD1Q               |                                 |                                              |                                                   |                       | CMD1Q           |               |
|                                     | CPT2                         | CPT2                | CPT2                            |                                              |                                                   |                       |                 |               |
| CRP                                 |                              | CRP                 |                                 |                                              |                                                   |                       | CRP             |               |
| CRYAB                               |                              | CRYAB               | CRYAB                           |                                              |                                                   |                       |                 |               |
| <b>CSRP3</b>                        | <b>CSRP3</b>                 |                     |                                 |                                              |                                                   |                       |                 | <b>CSRP3</b>  |
|                                     | <b>CTF1</b>                  |                     |                                 |                                              |                                                   |                       |                 | <b>CTF1</b>   |
| CTLA4                               |                              | CTLA4               |                                 |                                              | CTLA4                                             |                       |                 |               |
| CTNNA3                              | CTNNA3                       | CTNNA3              |                                 | CTNNA3                                       |                                                   |                       |                 |               |
| CTSB                                |                              | CTSB                |                                 |                                              | CTSB                                              |                       |                 |               |
| CTSL                                |                              | CTSL                |                                 |                                              |                                                   |                       | CTSL            |               |
| CX3CR1                              |                              | CX3CR1              |                                 | CX3CR1                                       |                                                   |                       |                 |               |
| CXADR                               |                              | CXADR               |                                 |                                              | CXADR                                             |                       |                 |               |
| CYP2E1                              |                              | CYP2E1              |                                 |                                              | CYP2E1                                            |                       |                 |               |
| DAG1                                |                              | DAG1                | DAG1                            |                                              |                                                   |                       |                 |               |
| <b>DES</b>                          | <b>DES</b>                   |                     |                                 |                                              |                                                   |                       |                 | <b>DES</b>    |
| DMD                                 | DMD                          | DMD                 | DMD                             |                                              |                                                   |                       |                 |               |
| DNAJC19                             | DNAJC19                      | DNAJC19             | DNAJC19                         |                                              |                                                   |                       |                 |               |
|                                     | DOLK                         | DOLK                | DOLK                            |                                              |                                                   |                       |                 |               |
| DSC2                                |                              | DSC2                |                                 |                                              |                                                   | DSC                   |                 |               |
| <b>DSG2</b>                         | <b>DSG2</b>                  |                     |                                 |                                              |                                                   |                       |                 | <b>DSG2</b>   |
|                                     | <b>DSP</b>                   |                     |                                 |                                              |                                                   |                       |                 | <b>DSP</b>    |
|                                     | <b>DTNA</b>                  |                     |                                 |                                              |                                                   |                       |                 | <b>DTNA</b>   |
| EDN1                                |                              | EDN1                |                                 | EDN1                                         |                                                   |                       |                 |               |
| EDNRA                               |                              | EDNRA               |                                 |                                              | EDNRA                                             |                       |                 |               |
| EDNRB                               |                              | EDNRB               |                                 |                                              | EDNRB                                             |                       |                 |               |
|                                     | EMD                          | EMD                 | EMD                             |                                              |                                                   |                       |                 |               |
| ERBB2                               |                              | ERBB2               |                                 |                                              | ERBB2                                             |                       |                 |               |
| ESR1                                |                              | ESR1                |                                 | ESR1                                         |                                                   |                       |                 |               |
| ESR2                                |                              | ESR2                |                                 |                                              | ESR2                                              |                       |                 |               |

|               |               |          |          |        |       |             |               |
|---------------|---------------|----------|----------|--------|-------|-------------|---------------|
| ESRRB         |               | ESRRB    |          | ESRRB  |       |             |               |
| <b>EYA4</b>   | <b>EYA4</b>   |          |          |        |       | <b>EYA4</b> |               |
| FAS           |               | FAS      |          | FAS    |       |             |               |
| FBXO32        |               | FBXO32   |          |        |       | FBXO32      |               |
| FHOD3         |               | FHOD3    |          |        |       | FHOD3       |               |
|               | FHL1          | FHL1     | FHL1     |        |       |             |               |
|               | FHL2          | FHL2     | FHL2     |        |       |             |               |
| FKRP          | FKRP          | FKRP     | FKRP     |        |       |             |               |
| FKTN          | FKTN          | FKTN     | FKTN     |        |       |             |               |
| <b>FLNC</b>   | <b>FLNC</b>   |          |          |        |       |             | <b>FLNC</b>   |
| FN1           |               | FN1      |          | FN1    |       |             |               |
| FOXD4         |               | FOXD4    |          |        |       | FOXD4       |               |
|               | FRDA/FXN      | FRDA/FXN | FRDA/FXN |        |       |             |               |
|               | GAA           | GAA      | GAA      |        |       |             |               |
| GATA4         | GATA4         | GATA4    |          |        | GATA4 |             |               |
| GATA6         | GATA6         | GATA6    |          |        | GATA6 |             |               |
| <b>GATAD1</b> | <b>GATAD1</b> |          |          |        |       |             | <b>GATAD1</b> |
| GBE1          |               | GBE1     | GBE1     |        |       |             |               |
| GDF1          |               | GDF1     | GDF1     | GDF1   |       |             |               |
| GJA4          |               | GJA4     |          |        |       | GJA4        |               |
|               | GLA           | GLA      | GLA      |        |       |             |               |
| HAND1         |               | HAND1    |          |        |       | HAND1       |               |
| HAVCR1        |               | HAVCR1   |          |        |       | HAVCR1      |               |
|               | HCN4          | HCN4     |          | HCN4   |       |             |               |
| HFE           | HFE           | HFE      |          | HFE    |       |             |               |
| HLA-DQB1      |               | HLA-DQB1 |          |        |       |             |               |
| HLA-DRB1      |               | HLA-DRB1 |          |        |       |             |               |
| HLA-DRB4      |               | HLA-DRB4 |          |        |       | HLA-DRB4    |               |
| HLA-G         |               | HLA-G    |          |        |       |             |               |
|               | HOPX          | HOPX     |          |        |       | HOPX        |               |
|               | HRAS          | HRAS     | HRAS     |        |       |             |               |
| HSPD1         |               | HSPD1    |          | HSPD1  |       |             |               |
| IFIH1         |               | IFIH1    |          | IFIH1  |       |             |               |
| IFNG          |               | IFNG     |          | IFNG   |       |             |               |
| IGF1          |               | IGF1     |          | IGF1   |       |             |               |
| IL10          |               | IL10     |          | IL10   |       |             |               |
| IL17A         |               | IL17A    |          |        |       | IL17A       |               |
| IL17F         |               | IL17F    |          | IL17F  |       |             |               |
| IL1B          |               | IL1B     |          | IL1B   |       |             |               |
| IL2RA         |               | IL2RA    |          | IL2RA  |       |             |               |
| IL6           |               | IL6      |          | IL6    |       |             |               |
|               | <b>ILK</b>    |          |          |        |       |             | <b>ILK</b>    |
| ITGA6         |               | ITGA6    |          | ITGA6  |       |             |               |
| ITGB1BP2      |               | ITGB1BP2 |          |        |       | ITGB1BP2    |               |
| ITGB4         |               | ITGB4    |          | ITGB4  |       |             |               |
| ITLN1         |               | ITLN1    |          |        |       | ITLN1       |               |
| ITPR2         |               | ITPR2    |          | ITPR2  |       |             |               |
|               | <b>JPH2</b>   |          |          |        |       |             | <b>JPH2</b>   |
|               | JUP           | JUP      |          | JUP    |       |             |               |
| KCNJ11        |               | KCNJ11   |          | KCNJ11 |       |             |               |
| KCNJ12        |               | KCNJ12   |          |        |       | KCNJ12      |               |
| KCNJ2         |               | KCNJ2    | KCNJ2    |        |       |             |               |
| KCNN3         |               | KCNN3    |          | KCNN3  |       |             |               |
| KCNQ1         | KCNQ1         | KCNQ1    | KCNQ1    |        |       |             |               |
|               | KRAS          | KRAS     | KRAS     |        |       |             |               |
| LAMA2         | LAMA2         | LAMA2    | LAMA2    |        |       |             |               |
| <b>LAMA4</b>  | <b>LAMA4</b>  |          |          |        |       |             | <b>LAMA4</b>  |
| LAMP2         | LAMP2         | LAMP2    | LAMP2    |        |       |             |               |
| LCN2          |               | LCN2     |          |        |       | LCN2        |               |
| <b>LDB3</b>   | <b>LDB3</b>   |          |          |        |       |             | <b>LDB3</b>   |
| LGALS3        |               | LGALS3   |          |        |       | LGALS3      |               |
| <b>LMNA</b>   |               |          |          |        |       |             | <b>LMNA</b>   |
| LRP1          |               | LRP1     |          | LRP1   |       |             |               |
| <b>LRRC10</b> | <b>LRRC10</b> |          |          |        |       |             | <b>LRRC10</b> |
| LRRC32        |               | LRRC32   |          |        |       | LRRC32      |               |
| LTBP4         |               | LTBP4    |          | LTBP4  |       |             |               |
|               | MAP2K1        | MAP2K1   | MAP2K1   |        |       |             |               |
|               | MAP2K2        | MAP2K2   | MAP2K2   |        |       |             |               |
| MAPK14        |               | MAPK14   |          |        |       | MAPK14      |               |
|               | <b>MIB1</b>   |          |          |        |       |             | <b>MIB1</b>   |
| MIR199A1      |               | MIR199A1 |          |        |       | MIR199A1    |               |
| MIR208A       |               | MIR208A  |          |        |       | MIR208A     |               |
| MIR214        |               | MIR214   |          |        |       | MIR214      |               |
| MIR451A       |               | MIR451A  |          |        |       | MIR451A     |               |
| MLIP          |               | MLIP     |          |        |       | MLIP        |               |



|                |                |            |                    |        |            |                |
|----------------|----------------|------------|--------------------|--------|------------|----------------|
| MMP1           |                | MMP1       |                    | MMP1   |            |                |
| MMP10          |                | MMP10      |                    |        | MMP10      |                |
| MMP14          |                | MMP14      |                    |        |            |                |
| MMP3           |                | MMP3       | MMP3               | MMP14  |            |                |
| MMP7           |                | MMP7       |                    |        | MMP7       |                |
| MMP9           |                | MMP9       |                    | MMP9   |            |                |
| MT-TI          |                | MT-TI      |                    |        |            |                |
|                | MTND1          | MTND1      | MTTI               |        |            |                |
|                | MTND5          | MTND5      | MTND1              |        |            |                |
|                | MTND6          | MTND6      | MTND5              |        |            |                |
|                | MTTD           | MTTD       | MTND6              |        |            |                |
|                | MTTG           | MTTG       | MTTD               |        |            |                |
|                | MTTH           | MTTH       | MTTG               |        |            |                |
|                | MTTI           | MTTI       | MTTH               |        |            |                |
|                | MTTK           | MTTK       | MTTI               |        |            |                |
|                | MTTL1          | MTTL1      | MTTK               |        |            |                |
|                | MTTL2          | MTTL2      | MTTL1              |        |            |                |
|                | MTTM           | MTTM       | MTTL2              |        |            |                |
|                | MTTQ           | MTTQ       |                    | MTTM   |            |                |
|                | MTTS1          | MTTS1      |                    | MTTQ   |            |                |
|                | MTTS2          | MTTS2      |                    | MTTS1  |            |                |
|                | MURC           | MURC/CAVIN |                    | MTTS2  |            |                |
| CAVIN4         |                |            |                    |        | MURC/CAVIN |                |
| MYBPC1         |                | MYBPC1     |                    | MYBPC1 |            |                |
| <b>MYBPC3</b>  | <b>MYBPC3</b>  |            |                    |        |            | <b>MYBPC3</b>  |
| MYC            |                | MYC        |                    | MYC    |            |                |
| <b>MYH6</b>    | <b>MYH6</b>    |            |                    |        |            | <b>MYH6</b>    |
| <b>MYH7</b>    | <b>MYH7</b>    |            |                    |        |            | <b>MYH7</b>    |
| <b>MYL2</b>    | <b>MYL2</b>    |            |                    |        |            | <b>MYL2</b>    |
|                | <b>MYL3</b>    |            |                    |        |            | <b>MYL3</b>    |
|                | MYLK2          | MYLK2      |                    |        |            |                |
| MYOM1          | MYOM1          | MYOM1      | MYLK2              |        |            |                |
|                | MYO22          | MYO22      | MYOM1              |        |            |                |
|                |                |            | MYO22              |        |            |                |
| <b>MYPN</b>    |                |            |                    |        |            | <b>MYPN</b>    |
| NAMPT          |                | NAMPT      |                    |        | NAMPT      |                |
| NDUFV1         |                | NDUFV1     |                    | NDUFV1 |            |                |
| <b>NEBL</b>    | <b>NEBL</b>    |            |                    |        |            | <b>NEBL</b>    |
| <b>NEXN</b>    | <b>NEXN</b>    |            |                    |        |            | <b>NEXN</b>    |
| NFKB1          | NFKB1          | NFKB1      |                    | NFKB1  |            |                |
|                | <b>NKX2-5</b>  |            |                    |        |            | <b>NKX2-5</b>  |
| NLRP3          |                | NLRP3      |                    | NLRP3  |            |                |
| NOS3           |                | NOS3       |                    | NOS3   |            |                |
| <b>NPPA</b>    | <b>NPPA</b>    |            |                    |        |            | <b>NPPA</b>    |
| NPPB           |                | NPPB       |                    |        | NPPB       |                |
| NPPC           |                | NPPC       |                    | NPPC   |            |                |
| NPR2           |                | NPR2       |                    | NPR2   |            |                |
| NR3C2          |                | NR3C2      |                    | NR3C2  |            |                |
|                | NRAS           | NRAS       | NRAS               |        |            |                |
| <b>OBSCN</b>   |                |            |                    |        |            | <b>OBSCN</b>   |
| OSM            |                | OSM        |                    |        | OSM        |                |
| PDCCD1         |                | PDCCD1     |                    | PDCCD1 |            |                |
| PDE2A          |                | PDE2A      |                    |        | PDE2A      |                |
| PDE3A          |                | PDE3A      |                    | PDE3A  |            |                |
|                | <b>PDLIM3</b>  |            |                    |        |            | <b>PDLIM3</b>  |
| PGM1           |                | PGM1       | PGM1               |        |            |                |
|                | <b>PKP2</b>    |            |                    |        |            | <b>PKP2</b>    |
| PLEC1          | PLEC1          | PLEC1      | PLEC               |        |            |                |
| <b>PLEKHM2</b> | <b>PLEKHM2</b> |            |                    |        |            | <b>PLEKHM2</b> |
| <b>PLN</b>     | <b>PLN</b>     |            |                    |        |            | <b>PLN</b>     |
| PNPLA2         |                | PNPLA2     | PNPLA2             |        |            |                |
| POLG           |                | POLG       | POLG               |        |            |                |
| PPP1R13L       |                | PPP1R13L   |                    |        | PPP1R13L   |                |
| <b>PRDM16</b>  | <b>PRDM16</b>  |            |                    |        |            | <b>PRDM16</b>  |
|                | PRKAG2         | PRKAG2     |                    | PRKAG2 |            |                |
| <b>PSEN1</b>   |                |            |                    |        |            | <b>PSEN1</b>   |
| <b>PSEN2</b>   |                |            |                    |        |            | <b>PSEN2</b>   |
|                | PTPN11         | PTPN11     | PTPN11             |        |            |                |
|                |                |            | RAF1               |        |            |                |
| RAF1           | RAF1           | RAF1       | (Noonan/Rasopathy) |        |            |                |
| RARRES2        |                | RARRES2    |                    |        | RARRES2    |                |
| <b>RBM20</b>   | <b>RBM20</b>   |            |                    |        |            | <b>RBM20</b>   |
|                |                |            | RIT1               |        |            |                |
|                | RIT1           | RIT1       | (noonan/rasopathy) |        |            |                |
| RYSR2          | RYSR2          | RYSR2      |                    |        |            |                |

|                                  |                                |                                             |                   |                   |                   |                  |                             |                  |
|----------------------------------|--------------------------------|---------------------------------------------|-------------------|-------------------|-------------------|------------------|-----------------------------|------------------|
| <b>SCN5A</b>                     | <b>SCN5A</b>                   |                                             |                   |                   |                   |                  |                             | <b>SCN5A</b>     |
| SDHA                             | SDHA                           |                                             | SDHA              |                   |                   |                  |                             |                  |
| SERPINE1                         |                                | SERPINE1                                    |                   |                   | SERPINE1          |                  |                             |                  |
|                                  | SGCA                           | SGCA                                        | SGCA              |                   |                   |                  |                             |                  |
|                                  | SGCB                           | SGCB                                        | SGCB              |                   |                   |                  |                             |                  |
| <b>SGCD</b>                      | <b>SGCD</b>                    |                                             |                   |                   |                   |                  |                             | <b>SGCD</b>      |
|                                  | SGCG                           | SGCG                                        | SGCG              |                   |                   |                  |                             |                  |
| SGK1                             |                                | SGK1                                        |                   |                   |                   |                  | SGK1                        |                  |
|                                  | SLC22A5                        | SLC22A5                                     | SLC22A5           |                   |                   |                  |                             |                  |
| SLC25A5P8                        |                                | SLC25A5P8                                   |                   |                   |                   |                  | SLC25A5P8                   |                  |
| SOD2                             | SOD2                           | SOD2                                        |                   |                   |                   |                  | SOD2                        |                  |
|                                  | SOS1                           | SOS1                                        | SOS1              |                   |                   |                  |                             |                  |
| SPEG                             |                                | SPEG                                        | SPEG              |                   |                   |                  |                             |                  |
| SRF                              |                                | SRF                                         |                   |                   |                   |                  | SRF                         |                  |
| STAT3                            |                                | STAT3                                       |                   |                   | STAT3             |                  |                             |                  |
| SYNE1                            |                                | SYNE1                                       | SYNE3             |                   |                   |                  |                             |                  |
|                                  | SYNM                           | SYNM                                        |                   |                   |                   |                  | SYNM                        |                  |
| TAX1BP3                          |                                | TAX1BP3                                     |                   |                   |                   |                  | TAX1BP3                     |                  |
| TAZ                              | TAZ                            | TAZ                                         | TAZ               |                   |                   |                  |                             |                  |
| <b>TBX20</b>                     | <b>TBX20</b>                   |                                             |                   |                   |                   |                  |                             | <b>TBX20</b>     |
| TBX5                             |                                | TBX5                                        |                   |                   | TBX5              |                  |                             |                  |
| <b>TCAP</b>                      | <b>TCAP</b>                    |                                             |                   |                   |                   |                  |                             | <b>TCAP</b>      |
| TFAP2A                           |                                | TFAP2A                                      |                   |                   | TFAP2A            |                  |                             |                  |
| TGFB1                            |                                | TGFB1                                       |                   |                   | TGFB1             |                  |                             |                  |
|                                  | TGFB3                          | TGFB3                                       | TGFB3             |                   |                   |                  |                             |                  |
| TIMP1                            |                                | TIMP1                                       |                   |                   |                   |                  | TIMP1                       |                  |
| TIMP4                            |                                | TIMP4                                       |                   |                   |                   |                  | TIMP4                       |                  |
|                                  | TMEM43                         | TMEM43                                      | TMEM43            |                   |                   |                  |                             |                  |
| TMPO                             |                                | TMPO                                        |                   |                   |                   |                  | TMPO                        |                  |
| TNC                              |                                | TNC                                         |                   |                   | TNC               |                  |                             |                  |
| TNF                              |                                | TNF                                         |                   |                   | TNF               |                  |                             |                  |
| TNFRSF11B                        |                                | TNFRSF11B                                   |                   |                   | TNFRSF11B         |                  |                             |                  |
| TNFRSF12A                        |                                | TNFRSF12A                                   |                   |                   |                   |                  | TNFRSF12A                   |                  |
| TNFSF10                          |                                | TNFSF10                                     |                   |                   |                   |                  | TITNFSF10                   |                  |
| TNFSF12                          |                                | TNFSF12                                     |                   |                   |                   |                  | TNFSF1                      |                  |
| <b>TNNC1</b>                     | <b>TNNC1</b>                   |                                             |                   |                   |                   |                  |                             | <b>TNNC1</b>     |
| <b>TNNI3</b>                     | <b>TNNI3</b>                   |                                             |                   |                   |                   |                  |                             | <b>TNNI3</b>     |
| <b>TNNI3K</b>                    | <b>TNNI3K</b>                  |                                             |                   |                   |                   |                  |                             | <b>TNNI3K</b>    |
| <b>TNNT2</b>                     | <b>TNNT2</b>                   |                                             |                   |                   |                   |                  |                             | <b>TNNT2</b>     |
| TP53                             |                                | TP53                                        |                   |                   | TP53              |                  |                             |                  |
| <b>TPM1</b>                      | <b>TPM1</b>                    |                                             |                   |                   |                   |                  |                             | <b>TPM1</b>      |
|                                  | TRDN                           | TRDN                                        | TRDN              |                   |                   |                  |                             |                  |
| TRPV2                            |                                | TRPV2                                       |                   |                   |                   |                  | TRPV2                       |                  |
| <b>TTN</b>                       | <b>TTN</b>                     |                                             |                   |                   |                   |                  |                             | <b>TTN</b>       |
|                                  | TTR                            | TTR                                         | TTR               |                   |                   |                  |                             |                  |
| TWIST1                           |                                | TWIST1                                      |                   |                   | TWIST             |                  |                             |                  |
| TXNRD2                           | TXNRD2                         | TXNRD2                                      | TXNRD2            |                   |                   |                  |                             |                  |
| <b>VCL</b>                       | <b>VCL</b>                     |                                             |                   |                   |                   |                  |                             | <b>VCL</b>       |
| VEGFA                            |                                | VEGFA                                       |                   |                   | VEGFA             |                  |                             |                  |
| ZASP                             |                                | ZASP                                        |                   |                   |                   |                  | REPEAT - SEE                |                  |
| ZBTB17                           | ZBTB17                         | ZBTB17                                      |                   |                   |                   |                  | LDB3                        |                  |
|                                  |                                |                                             |                   |                   |                   |                  | ZBTB17                      |                  |
| <b>TOTAL: 204</b>                | <b>TOTAL: 63 (125-62)</b>      | <b>TOTAL: 216</b>                           | <b>TOTAL: -55</b> | <b>TOTAL: -26</b> | <b>TOTAL: -70</b> | <b>TOTAL: -5</b> | <b>TOTAL: -60</b>           | <b>TOTAL: 51</b> |
| <b>TOTAL BEFORE REMOVED: 267</b> | <b>TOTAL AFTER REMOVED: 51</b> | <b>TOTAL OF ALL REMOVED CATEGORIES: 216</b> |                   |                   |                   |                  | <b>TOTAL FINAL LIST: 51</b> |                  |

Supplemental Table 2: DCM Panel Composition

| DCM Classification | Curated Genes | USA: Invitae | USA: EGL Genetic Diagnostics | USA: Prevention Genetics | USA: Cincinnati's Childrens Hospital | USA: Ambry Genetics | Finland: Blueprint Genetics | USA: Fulgent Genetics | USA: Washington University | Spain: Health in Code | USA: Knight Diagnostic Laboratories | Spain: CGC Genetics | USA: Gene Dx | Germany: CeGaT GmbH | Germany: MGZ - Medical Genetics Center | Canada: LifeLabs Genetics | USA: Sema4 | Panel Totals | % Panels Present |       |
|--------------------|---------------|--------------|------------------------------|--------------------------|--------------------------------------|---------------------|-----------------------------|-----------------------|----------------------------|-----------------------|-------------------------------------|---------------------|--------------|---------------------|----------------------------------------|---------------------------|------------|--------------|------------------|-------|
| Definitive         | BAG3          | 1            | 1                            | 1                        | 1                                    | 1                   | 1                           | 1                     | 1                          | 1                     | 1                                   | 1                   | 1            | 1                   | 1                                      | 1                         | 1          | 16           | 100.0%           |       |
|                    | DES           | 1            | 1                            | 1                        | 1                                    | 1                   | 1                           | 1                     | 1                          | 1                     | 1                                   | 1                   | 1            | 1                   | 1                                      | 1                         | 1          | 16           | 100.0%           |       |
|                    | LMNA          | 1            | 1                            | 1                        | 1                                    | 1                   | 1                           | 1                     | 1                          | 1                     | 1                                   | 1                   | 1            | 1                   | 1                                      | 1                         | 1          | 16           | 100.0%           |       |
|                    | MYH7          | 1            | 1                            | 1                        | 1                                    | 1                   | 1                           | 1                     | 1                          | 1                     | 1                                   | 1                   | 1            | 1                   | 1                                      | 1                         | 1          | 16           | 100.0%           |       |
|                    | PLN           | 1            | 1                            | 1                        | 1                                    | 1                   | 1                           | 1                     | 1                          | 1                     | 1                                   | 1                   | 1            | 1                   | 1                                      | 1                         | 1          | 16           | 100.0%           |       |
|                    | RBM20         | 1            | 1                            | 1                        | 1                                    | 1                   | 1                           | 1                     | 1                          | 1                     | 1                                   | 1                   | 1            | 1                   | 1                                      | 1                         | 1          | 16           | 100.0%           |       |
|                    | SCN5A         | 1            | 1                            | 1                        | 1                                    | 1                   | 1                           | 1                     | 1                          | 1                     | 1                                   | 1                   | 1            | 1                   | 1                                      | 1                         | 1          | 16           | 100.0%           |       |
|                    | TTN           | 1            | 1                            | 1                        | 1                                    | 1                   | 1                           | 1                     | 1                          | 1                     | 1                                   | 1                   | 1            | 1                   | 1                                      | 1                         | 1          | 16           | 100.0%           |       |
|                    | TNNC1         | 1            | 1                            | 1                        | 1                                    | 1                   | 1                           | 1                     | 1                          | 1                     | 0                                   | 1                   | 1            | 1                   | 1                                      | 1                         | 1          | 15           | 93.8%            |       |
|                    | TNNT2         | 1            | 1                            | 1                        | 1                                    | 1                   | 1                           | 1                     | 1                          | 1                     | 0                                   | 1                   | 1            | 1                   | 1                                      | 1                         | 1          | 15           | 93.8%            |       |
|                    | FLNC          | 1            | 0                            | 1                        | 1                                    | 1                   | 1                           | 1                     | 1                          | 1                     | 0                                   | 1                   | 1            | 1                   | 0                                      | 0                         | 1          | 12           | 75.0%            |       |
|                    |               |              |                              |                          |                                      |                     |                             |                       |                            |                       |                                     |                     |              |                     |                                        |                           |            |              | 0                | 0.0%  |
|                    | Strong        | DSP          | 1                            | 1                        | 1                                    | 1                   | 0                           | 1                     | 1                          | 0                     | 1                                   | 1                   | 1            | 1                   | 1                                      | 1                         | 1          | 1            | 14               | 87.5% |
|                    |               |              |                              |                          |                                      |                     |                             |                       |                            |                       |                                     |                     |              |                     |                                        |                           |            | 0            | 0.0%             |       |
| Moderate           | ACTC1         | 1            | 1                            | 1                        | 1                                    | 1                   | 1                           | 1                     | 1                          | 1                     | 1                                   | 1                   | 1            | 1                   | 1                                      | 1                         | 1          | 16           | 100.0%           |       |
|                    | TNNI3         | 1            | 1                            | 1                        | 1                                    | 1                   | 1                           | 1                     | 1                          | 1                     | 1                                   | 1                   | 1            | 1                   | 1                                      | 1                         | 1          | 16           | 100.0%           |       |
|                    | TPM1          | 1            | 1                            | 1                        | 1                                    | 1                   | 1                           | 1                     | 1                          | 1                     | 1                                   | 1                   | 1            | 1                   | 1                                      | 1                         | 1          | 16           | 100.0%           |       |
|                    | VCL           | 1            | 1                            | 1                        | 1                                    | 1                   | 1                           | 1                     | 1                          | 1                     | 1                                   | 1                   | 1            | 1                   | 1                                      | 1                         | 1          | 16           | 100.0%           |       |
|                    | ACTN2         | 0            | 1                            | 1                        | 1                                    | 1                   | 1                           | 1                     | 1                          | 1                     | 1                                   | 1                   | 1            | 1                   | 1                                      | 1                         | 1          | 15           | 93.8%            |       |
|                    | NEXN          | 1            | 1                            | 1                        | 1                                    | 1                   | 0                           | 1                     | 1                          | 1                     | 1                                   | 1                   | 1            | 1                   | 1                                      | 1                         | 1          | 15           | 93.8%            |       |
|                    | JPH2          | 0            | 0                            | 0                        | 1                                    | 0                   | 1                           | 1                     | 0                          | 0                     | 0                                   | 0                   | 0            | 1                   | 0                                      | 0                         | 0          | 4            | 25.0%            |       |
|                    |               |              |                              |                          |                                      |                     |                             |                       |                            |                       |                                     |                     |              |                     |                                        |                           |            | 0            | 0.0%             |       |
| Limited            | ABCC9         | 1            | 1                            | 1                        | 1                                    | 1                   | 1                           | 1                     | 1                          | 1                     | 1                                   | 1                   | 1            | 1                   | 1                                      | 1                         | 1          | 16           | 100.0%           |       |
|                    | LDB3          | 1            | 1                            | 1                        | 1                                    | 1                   | 1                           | 1                     | 1                          | 1                     | 1                                   | 1                   | 1            | 1                   | 1                                      | 1                         | 1          | 16           | 100.0%           |       |
|                    | MYBPC3        | 1            | 1                            | 1                        | 1                                    | 1                   | 1                           | 1                     | 1                          | 1                     | 1                                   | 1                   | 1            | 1                   | 1                                      | 1                         | 1          | 16           | 100.0%           |       |
|                    | MYH6          | 1            | 1                            | 1                        | 1                                    | 1                   | 1                           | 1                     | 1                          | 1                     | 1                                   | 1                   | 1            | 1                   | 1                                      | 1                         | 1          | 16           | 100.0%           |       |
|                    | TCAP          | 1            | 1                            | 1                        | 1                                    | 1                   | 1                           | 1                     | 1                          | 1                     | 1                                   | 1                   | 1            | 1                   | 1                                      | 1                         | 1          | 16           | 100.0%           |       |
|                    | ANKRD1        | 1            | 1                            | 1                        | 1                                    | 1                   | 0                           | 1                     | 1                          | 1                     | 1                                   | 1                   | 1            | 1                   | 1                                      | 1                         | 1          | 15           | 93.8%            |       |
|                    | CSRP3         | 1            | 1                            | 1                        | 1                                    | 1                   | 0                           | 1                     | 1                          | 1                     | 1                                   | 1                   | 1            | 1                   | 1                                      | 1                         | 1          | 15           | 93.8%            |       |
|                    | LAMA4         | 1            | 1                            | 1                        | 1                                    | 1                   | 1                           | 1                     | 0                          | 1                     | 1                                   | 1                   | 1            | 1                   | 1                                      | 1                         | 1          | 15           | 93.8%            |       |
|                    | MYPN          | 1            | 1                            | 1                        | 1                                    | 1                   | 0                           | 1                     | 1                          | 1                     | 1                                   | 1                   | 1            | 1                   | 1                                      | 1                         | 1          | 15           | 93.8%            |       |
|                    | DSG2          | 1            | 1                            | 1                        | 1                                    | 0                   | 1                           | 1                     | 0                          | 1                     | 1                                   | 1                   | 1            | 1                   | 1                                      | 1                         | 1          | 14           | 87.5%            |       |
|                    | GATAD1        | 1            | 1                            | 1                        | 1                                    | 0                   | 0                           | 1                     | 1                          | 1                     | 1                                   | 1                   | 1            | 1                   | 1                                      | 1                         | 1          | 14           | 87.5%            |       |
|                    | ILK           | 1            | 0                            | 1                        | 1                                    | 0                   | 1                           | 1                     | 1                          | 1                     | 1                                   | 1                   | 1            | 1                   | 1                                      | 1                         | 1          | 14           | 87.5%            |       |
|                    | NEBL          | 1            | 1                            | 1                        | 1                                    | 0                   | 0                           | 1                     | 1                          | 1                     | 1                                   | 1                   | 1            | 1                   | 1                                      | 0                         | 1          | 13           | 81.3%            |       |
|                    | PRDM16        | 1            | 1                            | 1                        | 1                                    | 0                   | 1                           | 1                     | 0                          | 1                     | 0                                   | 1                   | 1            | 1                   | 1                                      | 1                         | 1          | 13           | 81.3%            |       |
|                    | SGCD          | 0            | 1                            | 1                        | 1                                    | 0                   | 0                           | 1                     | 1                          | 1                     | 1                                   | 1                   | 1            | 1                   | 1                                      | 1                         | 1          | 13           | 81.3%            |       |
|                    | EYA4          | 1            | 0                            | 1                        | 1                                    | 0                   | 0                           | 1                     | 1                          | 1                     | 1                                   | 1                   | 0            | 0                   | 1                                      | 1                         | 1          | 11           | 68.8%            |       |
|                    | NKX2-5        | 1            | 0                            | 1                        | 1                                    | 1                   | 1                           | 1                     | 1                          | 1                     | 0                                   | 1                   | 1            | 0                   | 0                                      | 0                         | 0          | 10           | 62.5%            |       |
|                    | TBX20         | 0            | 0                            | 0                        | 1                                    | 1                   | 1                           | 1                     | 1                          | 1                     | 0                                   | 0                   | 1            | 0                   | 1                                      | 0                         | 1          | 9            | 56.3%            |       |
|                    | DTNA          | 0            | 0                            | 0                        | 1                                    | 0                   | 0                           | 1                     | 0                          | 0                     | 1                                   | 0                   | 0            | 1                   | 1                                      | 0                         | 0          | 5            | 31.3%            |       |
|                    | MYL2          | 0            | 0                            | 0                        | 1                                    | 0                   | 0                           | 1                     | 0                          | 1                     | 0                                   | 1                   | 0            | 1                   | 0                                      | 0                         | 0          | 5            | 31.3%            |       |
|                    | CTF1          | 1            | 0                            | 0                        | 0                                    | 0                   | 0                           | 1                     | 1                          | 0                     | 0                                   | 1                   | 0            | 0                   | 0                                      | 0                         | 0          | 4            | 25.0%            |       |
|                    | PLEKHM2       | 1            | 0                            | 0                        | 0                                    | 0                   | 1                           | 0                     | 1                          | 0                     | 0                                   | 0                   | 0            | 0                   | 0                                      | 0                         | 0          | 3            | 18.8%            |       |
|                    | PSEN2         | 0            | 0                            | 0                        | 0                                    | 0                   | 0                           | 0                     | 0                          | 1                     | 0                                   | 0                   | 1            | 0                   | 0                                      | 1                         | 0          | 3            | 18.8%            |       |
| TNNI3K             | 0             | 0            | 0                            | 0                        | 1                                    | 1                   | 0                           | 0                     | 1                          | 0                     | 0                                   | 0                   | 0            | 0                   | 0                                      | 0                         | 3          | 18.8%        |                  |       |
| OBSCN              | 0             | 0            | 0                            | 0                        | 0                                    | 0                   | 0                           | 0                     | 1                          | 0                     | 0                                   | 0                   | 0            | 0                   | 0                                      | 1                         | 2          | 12.5%        |                  |       |
|                    |               |              |                              |                          |                                      |                     |                             |                       |                            |                       |                                     |                     |              |                     |                                        |                           |            | 0            | 0.0%             |       |
| Disputed           | PDLIM3        | 1            | 1                            | 1                        | 1                                    | 0                   | 0                           | 1                     | 1                          | 1                     | 1                                   | 1                   | 0            | 1                   | 1                                      | 1                         | 0          | 12           | 75.0%            |       |

|               |        |   |   |   |   |   |   |   |   |   |   |   |   |   |   |   |   |    |       |
|---------------|--------|---|---|---|---|---|---|---|---|---|---|---|---|---|---|---|---|----|-------|
|               | PKP2   | 1 | 0 | 1 | 1 | 0 | 1 | 1 | 0 | 1 | 1 | 1 | 0 | 1 | 1 | 1 | 1 | 12 | 75.0% |
|               | MYL3   | 0 | 0 | 0 | 1 | 0 | 0 | 1 | 0 | 1 | 0 | 1 | 0 | 1 | 0 | 0 | 0 | 5  | 31.3% |
|               | PSEN1  | 0 | 0 | 0 | 0 | 0 | 0 | 0 | 0 | 1 | 0 | 1 | 0 | 0 | 1 | 0 | 0 | 3  | 18.8% |
|               |        |   |   |   |   |   |   |   |   |   |   |   |   |   |   |   |   | 0  | 0.0%  |
| No Known Dise | MIB1   | 0 | 0 | 1 | 1 | 0 | 0 | 1 | 0 | 1 | 0 | 0 | 1 | 0 | 0 | 0 | 0 | 5  | 31.3% |
|               | LRRC10 | 1 | 0 | 0 | 1 | 0 | 1 | 0 | 1 | 0 | 0 | 0 | 1 | 0 | 0 | 0 | 0 | 5  | 31.3% |
|               | NPPA   | 1 | 0 | 0 | 0 | 0 | 0 | 1 | 1 | 0 | 0 | 1 | 0 | 0 | 0 | 0 | 0 | 4  | 25.0% |
